# Supplementary material for: An efficient WSe2/Co0.85Se/graphene hybrid catalyst for electrochemical hydrogen evolution reaction
Source: Royal Society of Chemistry journal article supplement (doi:10.1039/c6ra08618g), 2016-01-01
Supplement: c6ra08618g1.pdf [file c6ra08618g1.pdf]

## Supporting information

### **An efficient WSe<sub>2</sub>/Co<sub>0.85</sub>Se/Graphene hybrid catalyst for electrochemical hydrogen evolution reaction**

Yanmin Huang,<sup>†b</sup> Zhuo Ma,<sup>†c</sup> Yunxia Hu,<sup>b</sup> Dongfeng Chai,<sup>d</sup> Yunfeng Qiu,<sup>\*a, b</sup>

Guanggang Gao<sup>\*d</sup> and PingAn Hu<sup>\*b</sup>

<sup>a</sup> *State Key Laboratory of Urban Water Resource and Environment, Harbin Institute of Technology, Harbin 150090, China. E-mail: qiuyf@hit.edu.cn (Qiu Y.)*

<sup>b</sup> *Key Lab of Microsystem and Microstructure of Ministry of Education, Harbin Institute of Technology, Harbin 150080, China. E-mail: hupa@hit.edu.cn (Hu. P.)*

<sup>c</sup> *School of Life Science and Technology, Harbin Institute of Technology, 92 West Dazhi Street, Harbin, Heilongjiang, 150001, P.R. China.*

<sup>d</sup> *Department of Chemistry, College of Pharmacy, Jiamusi University, Jiamusi, China  
gaogg@jmsu.edu.cn (Gao. G.)*

<sup>†</sup> These two authors made equal contributions.

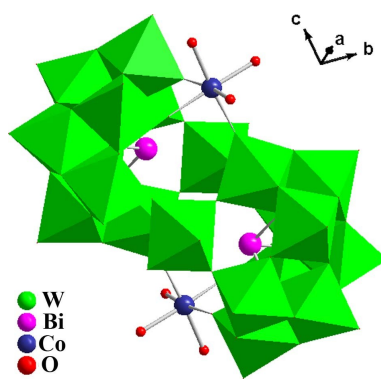

**Figure S1.** Crystal structure of  $\text{Na}_{12}[\text{Co}(\text{H}_2\text{O})_2(\text{OH})_2\{\text{Bi}_2\text{W}_{22}\text{O}_{74}(\text{OH})_2\}]_{48}\text{H}_{20}$   
(Denoted as  $\text{Bi}_2\text{W}_{22}\text{Co}_2$ ).

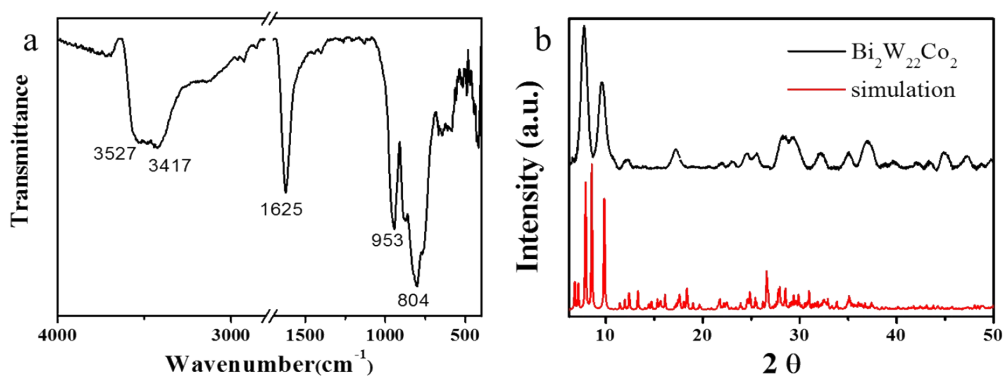

**Figure S2.** (a) FT-IR spectrum of  $\text{Bi}_2\text{W}_{20}\text{Co}_2$ ; (b) XRD patterns of  $\text{Bi}_2\text{W}_{20}\text{Co}_2$  powder and simulated curve from cif data.

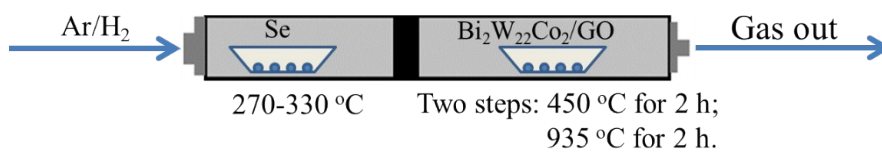

**Scheme S1.** Synthetic procedure of  $\text{Co-WSe}_2/\text{rGO}$  with different amount of rGO via CVD selenization.

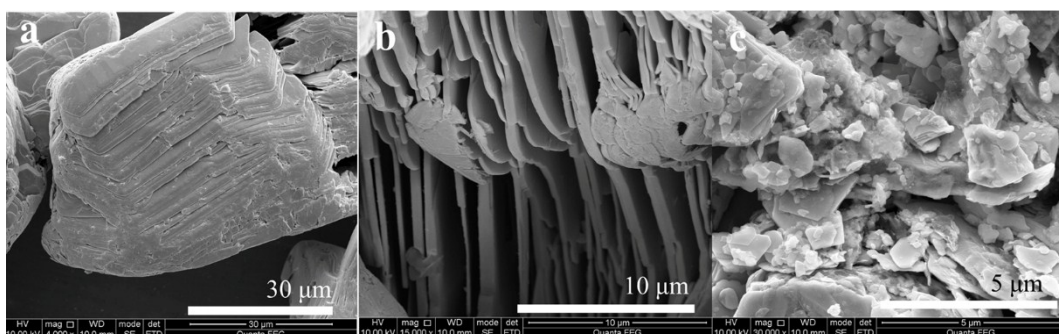

**Figure S3.** SEM images of (a) as-synthesized Co-WSe<sub>2</sub>/rGO<sub>2</sub> and sonicated at (b) 10 and (c) 30 mins, respectively. The initial morphology is bulk aggregate with layered structures, and ethanol facilitated exfoliation took place during sonication. As shown in (b), sheet-like structures were formed, and the whole aggregated became loose. Finally, the as-synthesized was exfoliated into irregular sheet-like aggregates.

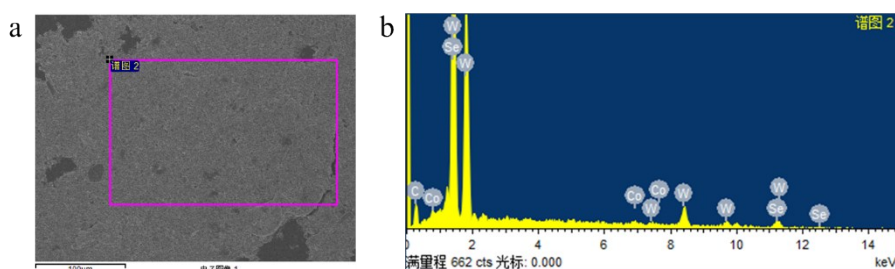

**Figure S4.** (a) Low magnification image of Co-WSe<sub>2</sub>/rGO<sub>2</sub>; (b) EDS profile of Co-WSe<sub>2</sub>/rGO<sub>2</sub> in the selected area of a.

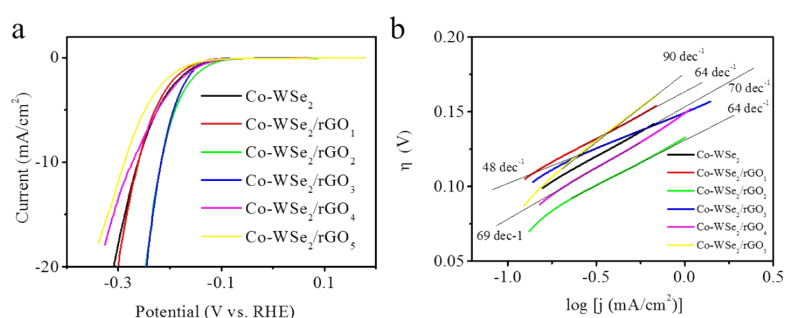

**Figure S5.** (a) Polarization curves of Co-WSe<sub>2</sub>/rGO composites as a function of rGO contents. (b) Corresponding tafel curves of Co-WSe<sub>2</sub>/rGO composites.

**Table S1.** Comparisons of our Co-WSe<sub>2</sub>/rGO composites and previous HER catalysts.

| Sample                                                      | Loading mass (mg/cm <sup>2</sup> ) | $\eta_{10}$ (mV)     | Tafel slope (dec <sup>-1</sup> ) | $j_0$ (mA/cm <sup>2</sup> ) | reference |
|-------------------------------------------------------------|------------------------------------|----------------------|----------------------------------|-----------------------------|-----------|
| WSe <sub>2</sub> /W foil                                    | —                                  | 350                  | —                                | —                           | 1         |
| WSe <sub>2</sub> /Si NWs                                    | —                                  | 300                  | 77.4                             | $\sim 4.5 \times 10^{-3}$   | 2         |
| WS <sub>2(1-x)}</sub> Se <sub>2x</sub>                      | 0.21                               | 298                  | 99                               | $29 \times 10^{-3}$         | 3         |
| Exfoliated WSe <sub>2</sub>                                 | 0.057                              | 800                  | 120                              | $3.6 \times 10^{-5}$        | 4         |
| 3D dendritic WSe <sub>2</sub>                               | 2.2-2.5                            | 228                  | 80                               | $15 \times 10^{-3}$         | 5         |
| WS <sub>2(1-x)}</sub> Se <sub>2x</sub> nanoflakes on CF     | —                                  | 158                  | 98                               | 0.240                       | 6         |
| thin films of tungsten selenides                            | —                                  | 245                  | 98                               | —                           | 7         |
| Metallic WS <sub>2(1-x)}</sub> Se <sub>2x</sub> Nanoribbons | 0.3                                | 170                  | 78                               | 0.025                       | 8         |
| Monolayer WS <sub>2(1-x)}</sub> Se <sub>2x</sub>            | —                                  | 80 (onset potential) | 85                               | —                           | 9         |
| Co-WSe <sub>2</sub> /rGO <sub>1</sub>                       | 0.56                               | 260                  | 64                               | $4.81 \times 10^{-3}$       | This work |
| Co-WSe <sub>2</sub> /rGO <sub>2</sub>                       | 0.56                               | 217                  | 64                               | $15.3 \times 10^{-3}$       | This work |
| Co-WSe <sub>2</sub> /rGO <sub>3</sub>                       | 0.56                               | 217                  | 48                               | $0.7 \times 10^{-3}$        | This work |
| Co-WSe <sub>2</sub> /rGO <sub>4</sub>                       | 0.56                               | 273                  | 68                               | $11.6 \times 10^{-3}$       | This work |
| Co-WSe <sub>2</sub> /rGO <sub>5</sub>                       | 0.56                               | 290                  | 90                               | $6.98 \times 10^{-3}$       | This work |

$\eta_0$ : Onset potential was obtained at current density of 0.5 mA/cm<sup>2</sup>;

$\eta_{10}$ : Over potential was obtained at current density of 10 mA/cm<sup>2</sup>;

$J_0$ : Exchange current density for the catalysts were obtained from the Tafel curves by using the extrapolation method.

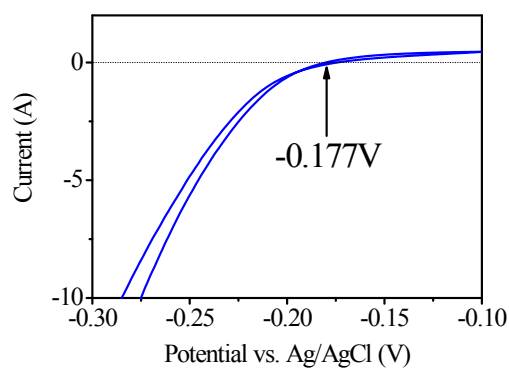

**Figure S6.** Cyclic voltammetry curve of the calibrated Ag/AgCl electrode.

## References

1. J. M. Velazquez, F. H. Saadi, A. P. Pieterick, J. M. Spurgeon, M. P. Soriaga, B. S. Brunshwig and N. S. Lewis, *J. Electroanal. Chem.*, 2014, **716**, 45-48.
2. H. Wang, D. Kong, P. Johanes, J. J. Cha, G. Zheng, K. Yan, N. Liu and Y. Cui, *Nano letters*, 2013, **13**, 3426-3433.
3. K. Xu, F. Wang, Z. Wang, X. Zhan, Q. Wang, Z. Cheng, M. Safdar and J. He, *ACS Nano*, 2014, **8**, 8468-8476.
4. A. Y. S. Eng, A. Ambrosi, Z. k. Sofer, P. Simek and M. Pumera, *ACS nano*, 2014, **8**, 12185-12198.
5. M. Zou, J. Zhang, H. Zhu, M. Du, Q. Wang, M. Zhang and X. Zhang, *J. Mater. Chem. A*, 2015, **3**, 12149-12153.
6. M. Zou, J. Chen, L. Xiao, H. Zhu, T. Yang, M. Zhang and M. Du, *J. Mater. Chem. A*, 2015, **3**, 18090-18097.
7. R. Romanov, S. Grigoriev, V. Fominski, M. Volosova and M. Demin, *Physics Procedia*, 2015, **71**, 348-353.
8. F. Wang, J. Li, F. Wang, T. A. Shifa, Z. Cheng, Z. Wang, K. Xu, X. Zhan, Q. Wang and Y. Huang, *Adv. Funct. Mater.*, 2015, **25**, 6077-6083.
9. Q. Fu, L. Yang, W. Wang, A. Han, J. Huang, P. Du, Z. Fan, J. Zhang and B. Xiang, *Adv. Mater.*, 2015, **27**, 4732-4738.
